# Supplementary material for: Effect of temperature on the complexation of triscarbonatouranyl(vi) with calcium and magnesium in NaCl aqueous solution
Source: Royal Society of Chemistry journal article supplement (doi:10.1039/d1dt03204f), 2021-01-01
Supplement: d1dt03204f1.pdf [file d1dt03204f1.pdf]

# Effect of Temperature on the Complexation of Triscarbonatouranyl(VI) with Calcium and Magnesium in NaCl Aqueous Solution.

*Chengming Shang and Pascal E. Reiller\**

Université Paris-Saclay, CEA, Service d'Études Analytiques et de Réactivité des Surfaces (SEARS), F-91191 Gif-sur-Yvette CEDEX, France.

Uranium; Carbonate; Ternary magnesium-uranyl-carbonate complexes; Luminescence.

\*Email [pascal.reiller@cea.fr](mailto:pascal.reiller@cea.fr)

Number of pages: 12

Number of Tables: 9

Number of Figures: 5

Table S1. Composition and properties of standard buffer solutions.

| pH value at 25°                  | 1.68                                                                          | 4.01                                                                                  | 6.87                                                                                    | 9.18                                                                     |
|----------------------------------|-------------------------------------------------------------------------------|---------------------------------------------------------------------------------------|-----------------------------------------------------------------------------------------|--------------------------------------------------------------------------|
| Composition <sup>1</sup>         | 0.05m potassium tetraoxalate (KH <sub>3</sub> C <sub>4</sub> O <sub>8</sub> ) | 0.05 m potassium hydrogen phthalate (KHC <sub>8</sub> H <sub>4</sub> O <sub>4</sub> ) | 0.025 m KH <sub>2</sub> PO <sub>4</sub> and 0.025 m (Na <sub>2</sub> HPO <sub>4</sub> ) | 0.01 m Na <sub>2</sub> B <sub>4</sub> O <sub>7</sub> ·10H <sub>2</sub> O |
| Temperature range                | 0-95                                                                          | 0-95                                                                                  | 0-95                                                                                    | 0-50                                                                     |
| Temperature coefficient $dpH/dt$ | --                                                                            | +0.0012                                                                               | -0.0028                                                                                 | -0.0028                                                                  |

Table S2. Recalculated pH values of buffer solutions at investigated temperatures and potential values  $E_{mes}$  read on pH-meter.

| Temp | pH   | $E_{mes}$ (mV) | Slope  | Intercept |
|------|------|----------------|------|----------------|------|----------------|------|----------------|--------|-----------|
| 5°   | 1.67 | 299.1          | 4.00 | 166.9          | 6.95 | 1.8            | 9.39 | -133.4         | -56.01 | 391.81    |
| 10°  | 1.67 | 299.5          | 4.00 | 166.2          | 6.92 | 0.8            | 9.33 | -135.1         | -56.72 | 393.69    |
| 15°  | 1.67 | 302.2          | 4.00 | 165.5          | 6.90 | -0.5           | 9.28 | -135.2         | -57.45 | 396.79    |
| 22°  | 1.68 | 304.2          | 4.00 | 164.9          | 6.88 | -1.4           | 9.23 | -136.1         | -58.24 | 400.18    |
| 30°  | 1.68 | 308.2          | 4.01 | 165.6          | 6.85 | -3.3           | 9.14 | -138.8         | -59.86 | 407.39    |
| 35°  | 1.69 | 311.2          | 4.02 | 167.1          | 6.84 | -3.2           | 9.11 | -139.5         | -60.70 | 412.58    |
| 40°  | 1.69 | 314            | 4.03 | 168.7          | 6.84 | -3             | 9.07 | -140.2         | -61.49 | 417.38    |
| 45°  | 1.70 | 318.2          | 4.04 | 171.4          | 6.83 | -3.1           | 9.04 | -140           | -62.44 | 423.97    |
| 50°  | 1.71 | 321.2          | 4.06 | 171.9          | 6.83 | -3.3           | 9.02 | -140.4         | -63.16 | 428.74    |

Table S3 Stability constants of the U(VI) complexes at 25°C and  $I_m = 0$ , used in this work.

| Reaction                                                                                                                                                          | $\log_{10}K^\circ$ | $\Delta_r H_m^\circ$ (kJ mol <sup>-1</sup> ) | References                                                  |
|-------------------------------------------------------------------------------------------------------------------------------------------------------------------|--------------------|----------------------------------------------|-------------------------------------------------------------|
| $\text{CO}_2(\text{g}) + \text{H}_2\text{O} \rightleftharpoons \text{CO}_3^{2-} + 2\text{H}^+$                                                                    | $-18.15 \pm 0.06$  | $4.11 \pm 0.28$                              | Guillaumont <i>et al.</i> <sup>2</sup>                      |
| $\text{CO}_3^{2-} + 2\text{H}^+ \rightleftharpoons \text{CO}_2(\text{aq}) + \text{H}_2\text{O}$                                                                   | $16.68 \pm 0.05$   | $-23.86 \pm 0.14$                            | Guillaumont <i>et al.</i> <sup>2</sup>                      |
| $\text{CO}_3^{2-} + \text{H}^+ \rightleftharpoons \text{HCO}_3^-$                                                                                                 | $10.33 \pm 0.05$   | $-14.70 \pm 0.15$                            | Guillaumont <i>et al.</i> <sup>2</sup>                      |
| $\text{UO}_2^{2+} + \text{H}_2\text{O} \rightleftharpoons \text{UO}_2(\text{OH})^+ + \text{H}^+$                                                                  | $-5.25 \pm 0.24$   | $43.46 \pm 5.55$                             | Guillaumont <i>et al.</i> <sup>2</sup>                      |
| $\text{UO}_2^{2+} + 2\text{H}_2\text{O} \rightleftharpoons \text{UO}_2(\text{OH})_2(\text{aq}) + 2\text{H}^+$                                                     | $-12.15 \pm 0.07$  | $111.16^3$                                   | Guillaumont <i>et al.</i> <sup>2</sup>                      |
| $3\text{UO}_2^{2+} + 5\text{H}_2\text{O} \rightleftharpoons (\text{UO}_2)_3(\text{OH})_5^+ + 5\text{H}^+$                                                         | $-15.55 \pm 0.12$  | $123.70 \pm 0.60$                            | Guillaumont <i>et al.</i> <sup>2</sup>                      |
| $\text{UO}_2^{2+} + \text{CO}_3^{2-} \rightleftharpoons \text{UO}_2(\text{CO}_3)(\text{aq})$                                                                      | $9.94 \pm 0.03$    | $5.0 \pm 2.0$                                | Guillaumont <i>et al.</i> <sup>2</sup>                      |
| $\text{UO}_2^{2+} + 2\text{CO}_3^{2-} \rightleftharpoons \text{UO}_2(\text{CO}_3)_2^{2-}$                                                                         | $16.61 \pm 0.09$   | $18.50 \pm 4.0$                              | Guillaumont <i>et al.</i> <sup>2</sup>                      |
| $\text{UO}_2^{2+} + 3\text{CO}_3^{2-} \rightleftharpoons \text{UO}_2(\text{CO}_3)_3^{4-}$                                                                         | $21.84 \pm 0.04$   | $-39.20 \pm 4.10$                            | Guillaumont <i>et al.</i> <sup>2</sup>                      |
| $2\text{UO}_2^{2+} + \text{CO}_2(\text{g}) + 4\text{H}_2\text{O} \rightleftharpoons$<br>$(\text{UO}_2)_2\text{CO}_3(\text{OH})_3^- + 5\text{H}^+$                 | $-19.01 \pm 0.50$  | –                                            | Guillaumont <i>et al.</i> <sup>2</sup>                      |
| $2\text{UO}_2^{2+} + \text{CO}_3^{2-} + 3\text{H}_2\text{O} \rightleftharpoons$<br>$(\text{UO}_2)_2\text{CO}_3(\text{OH})_3^- + 3\text{H}^+$                      | $-0.86 \pm 0.50$   |                                              | Recalculated from<br>Guillaumont <i>et al.</i> <sup>2</sup> |
| $\text{UO}_2(\text{CO}_3)_3^{4-} + 4\text{H}^+ \rightleftharpoons \text{UO}_2(\text{CO}_3)(\text{aq}) +$<br>$2\text{CO}_2(\text{g}) + 2\text{H}_2\text{O}$        | $24.40 \pm 0.19$   | $35.98 \pm 3.64$                             | Recalculated from<br>Guillaumont <i>et al.</i> <sup>2</sup> |
| $\text{UO}_2(\text{CO}_3)_3^{4-} + 2\text{H}^+ \rightleftharpoons \text{UO}_2(\text{CO}_3)_2^{2-} +$<br>$\text{CO}_2(\text{g}) + \text{H}_2\text{O}$              | $12.92 \pm 0.13$   | $53.59 \pm 1.05$                             | Recalculated from<br>Guillaumont <i>et al.</i> <sup>2</sup> |
| $2\text{UO}_2(\text{CO}_3)_3^{4-} + 7\text{H}^+ \rightleftharpoons$<br>$(\text{UO}_2)_2\text{CO}_3(\text{OH})_3^- + 5\text{CO}_2(\text{g}) + 2\text{H}_2\text{O}$ | $46.22 \pm 0.30$   | –                                            | Recalculated from<br>Guillaumont <i>et al.</i> <sup>2</sup> |

Table S4 Main specific ion interaction coefficients used in this work.

| Specific ion interaction coefficient                                 | Value ( $\pm 1\sigma$ ) | Ref.                                   |
|----------------------------------------------------------------------|-------------------------|----------------------------------------|
| $\epsilon(\text{H}^+, \text{Cl}^-)$                                  | $0.12 \pm 0.01$         | Guillaumont <i>et al.</i> <sup>2</sup> |
| $\epsilon(\text{Na}^+, \text{CO}_3^{2-})$                            | $-0.08 \pm 0.03$        | Guillaumont <i>et al.</i> <sup>2</sup> |
| $\epsilon(\text{UO}_2^{2+}, \text{Cl}^-)$                            | $0.46 \pm 0.03$         | Guillaumont <i>et al.</i> <sup>2</sup> |
| $\epsilon(\text{Mg}^{2+}, \text{Cl}^-)$                              | $0.19 \pm 0.02$         | Guillaumont <i>et al.</i> <sup>2</sup> |
| $\epsilon(\text{UO}_2(\text{CO}_3)_2^{2-}, \text{Na}^+)$             | $-0.02 \pm 0.09$        | Guillaumont <i>et al.</i> <sup>2</sup> |
| $\epsilon(\text{UO}_2(\text{CO}_3)_3^{4-}, \text{Na}^+)$             | $-0.01 \pm 0.11$        | Guillaumont <i>et al.</i> <sup>2</sup> |
| $\epsilon(\text{MgUO}_2(\text{CO}_3)_3^{2-}, \text{Na}^+)$ (in NaCl) | $0.31 \pm 0.02$         | Shang <i>et al.</i> <sup>4</sup>       |
| $\epsilon(\text{CaUO}_2(\text{CO}_3)_3^{2-}, \text{Na}^+)$ (in NaCl) | $0.29 \pm 0.11$         | Shang <i>et al.</i> <sup>5</sup>       |
| $\epsilon(\text{Ca}_2\text{UO}_2(\text{CO}_3)_3, \text{NaCl})$       | $0.66 \pm 0.22$         | Shang <i>et al.</i> <sup>5</sup>       |

Table S5(a). Experimental sample information: pH values, calculated Ringböm coefficients  $\alpha$  — see Shang *et al.*<sup>4-6</sup> for details —,  $[\text{Mg}^{2+}]$  ( $\text{mol}\cdot\text{kg}_w^{-1}$ ) and deduced  $F_0$ ; the sample solutions giving the slope of 1 are set in *italics*.

| <i>T</i> (°C) | 5        |          |                                                             |                   | 10              |          |                                                             |                |
|---------------|----------|----------|-------------------------------------------------------------|-------------------|-----------------|----------|-------------------------------------------------------------|----------------|
| Sample        | pH value | $\alpha$ | $[\text{Mg}^{2+}]$<br>( $\text{mol}\cdot\text{kg}_w^{-1}$ ) | $F_0$<br>(counts) | pH value        | $\alpha$ | $[\text{Mg}^{2+}]$<br>( $\text{mol}\cdot\text{kg}_w^{-1}$ ) | $F_0$ (counts) |
| 1             | 8.92     | 1.00     | 0                                                           | 1.46E+08          | 8.99            | 1.00     | 1.00E-05                                                    | 1.26E+08       |
| 2             | 8.59     | 1.00     | 1.57E-04                                                    | 1.16E+08          | 8.61            | 1.00     | 1.57E-04                                                    | 1.45E+08       |
| 3             | 8.29     | 1.01     | 2.37E-04                                                    | 1.23E+08          | 8.30            | 1.01     | 2.37E-04                                                    | 1.29E+08       |
| 4             | 8.24     | 1.02     | 5.31E-04                                                    | 1.16E+08          | 8.26            | 1.01     | 5.31E-04                                                    | 1.66E+08       |
| 5             | 8.13     | 1.08     | 7.50E-04                                                    | 1.11E+08          | 8.18            | 1.03     | 1.18E-03                                                    | 1.35E+08       |
| 6             | 7.99     | 1.48     | 1.18E-03                                                    | 1.13E+08          | 8.05            | 1.19     | 1.18E-03                                                    | 1.24E+08       |
| 7             | 7.88     | 2.57     | 1.82E-03                                                    | 6.41E+07          | 7.89            | 1.31     | 1.82E-03                                                    | 1.06E+08       |
| 8             | 7.82     | 3.78     | 2.21E-03                                                    | 1.11E+08          | 7.82            | 2.63     | 2.21E-03                                                    | 1.42E+08       |
| 9             | 7.79     | 4.65     | 3.38E-03                                                    | 1.23E+08          | 7.79            | 5.13     | 3.38E-03                                                    | 1.04E+08       |
| 10            | 7.72     | 7.74     | 4.58E-03                                                    | 1.14E+08          | 7.72            | 7.96     | 4.58E-03                                                    | 1.16E+08       |
| 11            | 7.69     | 9.70     | 8.89E-03                                                    | 1.37E+08          | 7.69            | 12.55    | 8.89E-03                                                    | 1.77E+08       |
| 12            | 7.64     | 14.25    | 1.34E-02                                                    | 1.32E+08          | 7.64            | 16.95    | 1.34E-02                                                    | 2.06E+08       |
| 13            | 7.61     | 17.99    | 1.51E-02                                                    | 1.28E+08          | 7.61            | 25.30    | 1.51E-02                                                    | 2.39E+08       |
| 14            | 7.54     | 31.21    | 3.02E-02                                                    | 1.29E+08          | 7.54            | 34.37    | 3.02E-02                                                    | 2.26E+08       |
| <i>T</i> (°C) | 15       |          |                                                             |                   | 22 <sup>4</sup> |          |                                                             |                |
| Sample        | pH value | $\alpha$ | $[\text{Mg}^{2+}]$<br>( $\text{mol}\cdot\text{kg}_w^{-1}$ ) | $F_0$<br>(counts) | pH value        | $\alpha$ | $[\text{Mg}^{2+}]$<br>( $\text{mol}\cdot\text{kg}_w^{-1}$ ) | $F_0$ (counts) |
| 1             | 8.97     | 1.00     | 1.00E-05                                                    | 7.97E+07          | 9.17            | 1.00     | 0                                                           | 2.61E+07       |
| 2             | 8.80     | 1.00     | 1.57E-04                                                    | 6.20E+07          | 8.26            | 1.09     | 3.48E-04                                                    | 2.82E+07       |
| 3             | 8.42     | 1.01     | 2.37E-04                                                    | 6.38E+07          | 8.22            | 1.12     | 7.32E-04                                                    | 2.37E+07       |
| 4             | 8.38     | 1.01     | 5.31E-04                                                    | 5.52E+07          | 8.07            | 1.49     | 1.25E-03                                                    | 2.23E+07       |
| 5             | 8.26     | 1.04     | 1.18E-03                                                    | 5.04E+07          | 8.05            | 1.64     | 1.49E-03                                                    | 2.49E+07       |
| 6             | 8.10     | 1.22     | 1.18E-03                                                    | 5.38E+07          | 8.00            | 2.08     | 2.38E-03                                                    | 2.62E+07       |
| 7             | 8.05     | 1.41     | 1.82E-03                                                    | 5.74E+07          | 7.90            | 3.80     | 4.16E-03                                                    | 2.90E+07       |
| 8             | 7.90     | 3.00     | 2.21E-03                                                    | 6.08E+07          | 7.87            | 4.80     | 6.36E-03                                                    | 3.30E+07       |
| 9             | 7.86     | 3.90     | 3.38E-03                                                    | 5.95E+07          | 7.78            | 8.90     | 1.56E-02                                                    | 3.51E+07       |
| 10            | 7.78     | 6.88     | 4.58E-03                                                    | 6.21E+07          | 7.74            | 12.13    | 2.50E-02                                                    | 4.59E+07       |
| 11            | 7.72     | 10.80    | 8.89E-03                                                    | 7.20E+07          |                 |          |                                                             |                |
| <i>T</i> (°C) | 30       |          |                                                             |                   |                 |          |                                                             |                |
| Sample        | pH value | $\alpha$ | $[\text{Mg}^{2+}]$<br>( $\text{mol}\cdot\text{kg}_w^{-1}$ ) | $F_0$<br>(counts) |                 |          |                                                             |                |
| 1             | 8.97     | 1.00     | 1.00E-05                                                    | 9.65E+07          |                 |          |                                                             |                |
| 2             | 8.80     | 1.00     | 1.57E-04                                                    | 4.32E+07          |                 |          |                                                             |                |
| 3             | 8.42     | 1.03     | 2.37E-04                                                    | 8.18E+07          |                 |          |                                                             |                |
| 4             | 8.38     | 1.04     | 5.31E-04                                                    | 3.85E+07          |                 |          |                                                             |                |
| 5             | 8.25     | 1.10     | 1.18E-03                                                    | 5.23E+07          |                 |          |                                                             |                |
| 6             | 8.09     | 1.55     | 1.18E-03                                                    | 5.59E+07          |                 |          |                                                             |                |
| 7             | 8.05     | 1.84     | 2.21E-03                                                    | 4.96E+07          |                 |          |                                                             |                |
| 8             | 7.90     | 4.49     | 3.38E-03                                                    | 4.24E+07          |                 |          |                                                             |                |
| 9             | 7.81     | 8.56     | 4.58E-03                                                    | 6.01E+07          |                 |          |                                                             |                |
| 10            | 7.78     | 10.72    | 1.34E-02                                                    | 1.04E+08          |                 |          |                                                             |                |
| 11            | 7.75     | 13.48    | 1.51E-02                                                    | 1.23E+08          |                 |          |                                                             |                |
| 12            | 7.72     | 16.98    | 3.02E-02                                                    | 1.95E+08          |                 |          |                                                             |                |

Table S5(b). Experimental sample information – pH values, calculated Ringböm coefficients  $\alpha$ ,  $[\text{Ca}^{2+}]$  ( $\text{mol}\cdot\text{kg}_w^{-1}$ ) and deduced  $F_0$ ; the sample solutions giving the slope of 1 are set in *italics*; the sample solutions giving the slope of 2 are set in **bold**.

| $T$ ( $^{\circ}\text{C}$ ) |             | 10              |                                                             |                   |             | 15           |                                                             |                 |  |
|----------------------------|-------------|-----------------|-------------------------------------------------------------|-------------------|-------------|--------------|-------------------------------------------------------------|-----------------|--|
| Sample                     | pH value    | $\alpha$        | $[\text{Ca}^{2+}]$<br>( $\text{mol}\cdot\text{kg}_w^{-1}$ ) | $F_0$<br>(counts) | pH value    | $\alpha$     | $[\text{Ca}^{2+}]$<br>( $\text{mol}\cdot\text{kg}_w^{-1}$ ) | $F_0$ (counts)  |  |
| 1                          | 8.97        | 1.00            | 0                                                           | 3.42E+08          | 8.97        | 1.00         | 0                                                           | 5.22E+08        |  |
| 2                          | 8.50        | 1.00            | 5.72E-05                                                    | 2.92E+08          | 8.50        | 1.01         | 5.72E-05                                                    | 3.75E+08        |  |
| 3                          | 8.48        | 1.00            | 6.18E-05                                                    | 3.10E+08          | 8.48        | 1.01         | 6.18E-05                                                    | 3.65E+08        |  |
| 4                          | 8.36        | 1.01            | 6.48E-05                                                    | 3.15E+08          | 8.36        | 1.02         | 6.46E-05                                                    | 3.91E+08        |  |
| 5                          | 8.30        | 1.01            | 8.06E-05                                                    | 3.42E+08          | 8.20        | 1.07         | 8.72E-05                                                    | 4.21E+08        |  |
| 6                          | 8.22        | 1.03            | 9.87E-05                                                    | 3.50E+08          | 8.16        | 1.11         | 1.19E-04                                                    | 4.43E+08        |  |
| 7                          | 8.18        | 1.05            | 1.23E-04                                                    | 3.66E+08          | 8.12        | 1.18         | 1.56E-04                                                    | 4.44E+08        |  |
| 8                          | 8.08        | 1.18            | 1.57E-04                                                    | 3.80E+08          | 8.05        | 1.41         | 1.74E-04                                                    | 4.92E+08        |  |
| 9                          | 7.99        | 1.55            | 2.31E-04                                                    | 4.29E+08          | 8.00        | 1.72         | 2.45E-04                                                    | 5.19E+08        |  |
| 10                         | 7.92        | 2.17            | 4.80E-04                                                    | 4.51E+08          | 7.93        | 2.49         | 4.34E-04                                                    | 5.30E+08        |  |
| 11                         | 7.82        | 4.08            | 7.41E-04                                                    | 5.25E+08          | 7.87        | 3.64         | 6.65E-04                                                    | 5.35E+08        |  |
| 12                         | <b>7.78</b> | <b>5.43</b>     | <b>1.12E-03</b>                                             | <b>5.28E+08</b>   | <b>7.83</b> | <b>4.80</b>  | <b>1.15E-03</b>                                             | <b>5.42E+08</b> |  |
| 13                         | <b>7.75</b> | <b>6.75</b>     | <b>1.33E-03</b>                                             | <b>5.68E+08</b>   | <b>7.76</b> | <b>7.98</b>  | <b>1.76E-03</b>                                             | <b>5.78E+08</b> |  |
| 14                         | <b>7.70</b> | <b>9.82</b>     | <b>2.00E-03</b>                                             | <b>6.02E+08</b>   | <b>7.70</b> | <b>12.59</b> | <b>1.96E-03</b>                                             | <b>5.94E+08</b> |  |
| 15                         | <b>7.62</b> | <b>18.17</b>    | <b>2.63E-03</b>                                             | <b>6.13E+08</b>   | <b>7.62</b> | <b>23.45</b> | <b>2.26E-03</b>                                             | <b>6.58E+08</b> |  |
| 16                         | <b>7.56</b> | <b>29.13</b>    | <b>3.34E-03</b>                                             | <b>6.84E+08</b>   | <b>7.57</b> | <b>34.79</b> | <b>3.86E-03</b>                                             | <b>6.74E+08</b> |  |
| 17                         | <b>7.51</b> | <b>43.34</b>    | <b>4.40E-03</b>                                             | <b>7.77E+08</b>   | <b>7.50</b> | <b>60.70</b> | <b>4.28E-03</b>                                             | <b>7.12E+08</b> |  |
| $T$ ( $^{\circ}\text{C}$ ) |             | 22 <sup>5</sup> |                                                             |                   |             | 25           |                                                             |                 |  |
| Sample                     | pH value    | $\alpha$        | $[\text{Ca}^{2+}]$<br>( $\text{mol}\cdot\text{kg}_w^{-1}$ ) | $F_0$<br>(counts) | pH value    | $\alpha$     | $[\text{Ca}^{2+}]$<br>( $\text{mol}\cdot\text{kg}_w^{-1}$ ) | $F_0$ (counts)  |  |
| 1                          | 9.90        | 1.00            | 0                                                           | 1.70E+08          | 8.97        | 1.00         | 0                                                           | 3.77E+08        |  |
| 2                          | 8.66        | 1.06            | 2.78E-05                                                    | 1.66E+08          | 8.36        | 1.03         | 6.48E-05                                                    | 3.04E+08        |  |
| 3                          | 8.42        | 1.04            | 9.09E-05                                                    | 1.29E+08          | 8.16        | 1.19         | 1.39E-04                                                    | 3.27E+08        |  |
| 4                          | 8.26        | 1.10            | 1.76E-04                                                    | 1.75E+08          | 8.12        | 1.30         | 1.96E-04                                                    | 3.44E+08        |  |
| 5                          | 8.23        | 1.12            | 2.22E-04                                                    | 2.25E+08          | 8.05        | 1.65         | 2.87E-04                                                    | 3.70E+08        |  |
| 6                          | 8.15        | 1.24            | 3.06E-04                                                    | 2.40E+08          | 8.00        | 2.10         | 4.71E-04                                                    | 4.10E+08        |  |
| 7                          | 8.11        | 1.37            | 4.04E-04                                                    | 2.27E+08          | 7.93        | 3.19         | 8.44E-04                                                    | 3.91E+08        |  |
| 8                          | 8.10        | 1.34            | 4.93E-04                                                    | 2.18E+08          | 7.87        | 4.76         | 1.09E-03                                                    | 3.84E+08        |  |
| 9                          | 8.08        | 1.51            | 6.00E-04                                                    | 2.74E+08          | <b>7.83</b> | <b>6.33</b>  | <b>1.87E-03</b>                                             | <b>3.69E+08</b> |  |
| 10                         | 8.00        | 2.06            | 9.03E-04                                                    | 2.47E+08          | <b>7.76</b> | <b>10.64</b> | <b>2.69E-03</b>                                             | <b>3.88E+08</b> |  |
| 11                         | 7.97        | 2.52            | 1.22E-03                                                    | 3.08E+08          | <b>7.70</b> | <b>16.88</b> | <b>3.02E-03</b>                                             | <b>4.00E+08</b> |  |
| 12                         | 7.92        | 3.30            | 1.72E-03                                                    | 3.12E+08          | <b>7.62</b> | <b>31.61</b> | <b>4.07E-03</b>                                             | <b>4.19E+08</b> |  |
| 13                         | 7.87        | 4.79            | 2.08E-03                                                    | 3.32E+08          | <b>7.57</b> | <b>46.99</b> | <b>5.72E-03</b>                                             | <b>3.92E+08</b> |  |
| 14                         | 7.85        | 5.51            | 2.64E-03                                                    | 3.55E+08          | <b>7.50</b> | <b>82.02</b> | <b>8.23E-03</b>                                             | <b>4.33E+08</b> |  |
| 15                         | <b>7.81</b> | <b>7.07</b>     | <b>3.42E-03</b>                                             | <b>3.08E+08</b>   |             |              |                                                             |                 |  |
| 16                         | <b>7.75</b> | <b>11.55</b>    | <b>4.70E-03</b>                                             | <b>3.53E+08</b>   |             |              |                                                             |                 |  |
| 17                         | <b>7.63</b> | <b>28.25</b>    | <b>6.25E-03</b>                                             | <b>3.43E+08</b>   |             |              |                                                             |                 |  |
| 18                         | <b>7.60</b> | <b>37.08</b>    | <b>8.55E-03</b>                                             | <b>3.74E+08</b>   |             |              |                                                             |                 |  |
| 19                         | <b>7.55</b> | <b>53.34</b>    | <b>1.04E-02</b>                                             | <b>3.84E+08</b>   |             |              |                                                             |                 |  |
| 20                         | <b>7.52</b> | <b>70.02</b>    | <b>1.53E-02</b>                                             | <b>4.25E+08</b>   |             |              |                                                             |                 |  |
| 21                         | <b>7.50</b> | <b>79.91</b>    | <b>1.74E-02</b>                                             | <b>4.30E+08</b>   |             |              |                                                             |                 |  |
| 22                         | <b>7.48</b> | <b>96.30</b>    | <b>2.49E-02</b>                                             | <b>5.85E+08</b>   |             |              |                                                             |                 |  |

Table S5(b). continued

| T (°C) | 35          |              |                                                          |                         | 40          |              |                                                          |                         |
|--------|-------------|--------------|----------------------------------------------------------|-------------------------|-------------|--------------|----------------------------------------------------------|-------------------------|
| Sample | pH value    | $\alpha$     | [Ca <sup>2+</sup> ] (mol·kg <sub>w</sub> <sup>-1</sup> ) | F <sub>0</sub> (counts) | pH value    | $\alpha$     | [Ca <sup>2+</sup> ] (mol·kg <sub>w</sub> <sup>-1</sup> ) | F <sub>0</sub> (counts) |
| 1      | 8.97        | 1.00         | 0                                                        | 3.86E+08                | 8.97        | 1.00         | 0                                                        | 2.85E+07                |
| 2      | 8.58        | 1.01         | 2.69E-05                                                 | 1.71E+08                | 8.36        | 1.08         | 1.94E-04                                                 | 5.43E+07                |
| 3      | 8.55        | 1.02         | 4.67E-05                                                 | 1.04E+08                | 8.16        | 1.42         | 2.98E-04                                                 | 5.78E+07                |
| 4      | 8.50        | 1.02         | 5.72E-05                                                 | 3.66E+08                | 8.12        | 1.62         | 4.19E-04                                                 | 5.89E+07                |
| 5      | 8.48        | 1.03         | 6.18E-05                                                 | 3.49E+08                | 8.05        | 2.23         | 6.13E-04                                                 | 6.24E+07                |
| 6      | 8.36        | 1.06         | 6.48E-05                                                 | 2.07E+08                | 8.00        | 2.96         | 1.01E-03                                                 | 6.27E+07                |
| 7      | 8.16        | 1.33         | 1.39E-04                                                 | 2.90E+08                | 7.93        | 4.66         | 1.80E-03                                                 | 7.83E+07                |
| 8      | 8.12        | 1.50         | 1.96E-04                                                 | 2.98E+08                | 7.87        | 7.11         | 2.56E-03                                                 | 7.96E+07                |
| 9      | 8.05        | 2.02         | 2.87E-04                                                 | 3.20E+08                | <b>7.81</b> | <b>11.09</b> | <b>3.30E-03</b>                                          | <b>8.15E+07</b>         |
| 10     | 8.00        | 2.65         | 4.71E-04                                                 | 3.03E+08                | <b>7.78</b> | <b>13.93</b> | <b>4.25E-03</b>                                          | <b>9.20E+07</b>         |
| 11     | 7.93        | 4.13         | 8.44E-04                                                 | 3.19E+08                | <b>7.75</b> | <b>17.53</b> | <b>5.59E-03</b>                                          | <b>1.29E+08</b>         |
| 12     | 7.87        | 6.28         | 1.09E-03                                                 | 3.09E+08                | <b>7.71</b> | <b>23.90</b> | <b>7.04E-03</b>                                          | <b>1.43E+08</b>         |
| 13     | <b>7.78</b> | <b>12.24</b> | <b>1.80E-03</b>                                          | <b>3.11E+08</b>         | <b>7.68</b> | <b>30.21</b> | <b>7.77E-03</b>                                          | <b>1.58E+08</b>         |
| 14     | <b>7.70</b> | <b>22.69</b> | <b>2.15E-03</b>                                          | <b>3.73E+08</b>         |             |              |                                                          |                         |
| 15     | <b>7.62</b> | <b>42.54</b> | <b>3.25E-03</b>                                          | <b>3.37E+08</b>         |             |              |                                                          |                         |
| 16     | <b>7.57</b> | <b>80.28</b> | <b>4.50E-03</b>                                          | <b>3.41E+08</b>         |             |              |                                                          |                         |
| 17     | <b>7.49</b> | <b>119.6</b> | <b>7.20E-03</b>                                          | <b>3.79E+08</b>         |             |              |                                                          |                         |
| T (°C) | 45          |              |                                                          |                         | 50          |              |                                                          |                         |
| Sample | pH value    | $\alpha$     | [Ca <sup>2+</sup> ] (mol·kg <sub>w</sub> <sup>-1</sup> ) | F <sub>0</sub> (counts) | pH value    | $\alpha$     | [Ca <sup>2+</sup> ] (mol·kg <sub>w</sub> <sup>-1</sup> ) | F <sub>0</sub> (counts) |
| 1      | 8.97        | 1.00         | 0                                                        | 2.64E+07                | 8.97        | 1.00         | 0                                                        | 2.76E+07                |
| 2      | 8.48        | 1.05         | 1.10E-04                                                 | 3.20E+07                | 8.16        | 1.64         | 2.98E-04                                                 | 2.79E+07                |
| 3      | 8.36        | 1.10         | 1.94E-04                                                 | 4.81E+07                | 8.12        | 1.92         | 4.19E-04                                                 | 3.01E+07                |
| 4      | 8.16        | 1.52         | 2.98E-04                                                 | 3.08E+07                | 7.98        | 4.20         | 6.13E-04                                                 | 3.02E+07                |
| 5      | 8.12        | 1.76         | 4.19E-04                                                 | 3.82E+07                | 7.95        | 5.14         | 1.01E-03                                                 | 3.99E+07                |
| 6      | 8.05        | 2.47         | 6.13E-04                                                 | 4.30E+07                | 7.92        | 6.33         | 1.80E-03                                                 | 5.58E+07                |
| 7      | 8.00        | 3.31         | 1.01E-03                                                 | 4.34E+07                | 7.88        | 8.42         | 2.56E-03                                                 | 5.14E+07                |
| 8      | 7.93        | 5.24         | 1.80E-03                                                 | 5.57E+07                | <b>7.85</b> | <b>10.50</b> | <b>3.30E-03</b>                                          | <b>5.58E+07</b>         |
| 9      | <b>7.82</b> | <b>8.04</b>  | <b>2.56E-03</b>                                          | <b>5.64E+07</b>         | <b>7.80</b> | <b>15.29</b> | <b>4.25E-03</b>                                          | <b>6.60E+07</b>         |
| 10     | <b>7.78</b> | <b>15.78</b> | <b>3.30E-03</b>                                          | <b>7.19E+07</b>         | <b>7.75</b> | <b>22.42</b> | <b>5.59E-03</b>                                          | <b>7.22E+07</b>         |
| 11     | <b>7.72</b> | <b>19.87</b> | <b>4.25E-03</b>                                          | <b>7.94E+07</b>         | <b>7.73</b> | <b>26.18</b> | <b>7.70E-03</b>                                          | <b>8.28E+07</b>         |
| 12     | <b>7.69</b> | <b>27.09</b> | <b>5.59E-03</b>                                          | <b>1.00E+08</b>         | <b>7.70</b> | <b>33.06</b> | <b>9.09E-03</b>                                          | <b>9.48E+07</b>         |
| 13     | <b>7.65</b> | <b>34.25</b> | <b>7.70E-03</b>                                          | <b>1.00E+08</b>         |             |              |                                                          |                         |
| 14     | <b>7.62</b> | <b>43.35</b> | <b>9.09E-03</b>                                          | <b>1.20E+08</b>         |             |              |                                                          |                         |

Table S6. Values of the Debye-Hückel parameters  $A(T)$  at different temperatures, taken from the NEA-TDB reviews.<sup>7</sup>

| $t/^{\circ}\text{C}$ ( $p = 1\text{ bar}$ ) | $A(T) / \text{kg}^{1/2} \text{ mol}^{-1/2}$ |
|---------------------------------------------|---------------------------------------------|
| 5                                           | 0.494                                       |
| 10                                          | 0.497                                       |
| 15                                          | 0.501                                       |
| 20                                          | 0.505                                       |
| 25                                          | 0.509                                       |
| 30                                          | 0.513                                       |
| 35                                          | 0.518                                       |
| 40                                          | 0.523                                       |
| 50                                          | 0.533                                       |
| 75                                          | 0.564                                       |



Table S7 The formation constants of  $\log_{10}K_{013}^{\circ}$ ,  $\log_{10}Q_1$  and  $\log_{10}Q_2$  in the temperature range of 5-90°C, calculated using the exiting general formula; the global formation constants of  $\log_{10}\beta_{113}^{\circ}(\text{Ca})$ ,  $\log_{10}\beta_{213}^{\circ}(\text{Ca})$  and  $\log_{10}\beta^{\circ}_{113}(\text{Mg})$  were estimated with the Van't Hoff Equation; the formation constants of  $\log_{10}K^{\circ}_{113}(\text{Ca})$ ,  $\log_{10}K^{\circ}_{213}(\text{Ca})$ ,  $\log_{10}K^{\circ}_{113}(\text{Mg})$  were finally determined by subtracting the sum of  $\log_{10}K^{\circ}_{013}$ ,  $\log_{10}Q_1$  and  $\log_{10}Q_2$  from the global equilibrium constants  $\log_{10}\beta^{\circ}_{113}(\text{Ca})$ ,  $\log_{10}\beta^{\circ}_{213}(\text{Ca})$  and  $\log_{10}\beta^{\circ}_{113}(\text{Mg})$ .

| T (°C) | $\log_{10}K^{\circ}_{013}$<br>Götz et al. <sup>8</sup> | $\log_{10}Q_1$<br>Patterson et al. <sup>9</sup> | $\log_{10}Q_2$<br>Patterson et al. <sup>10</sup> | $\log_{10}\beta^{\circ}_{113}(\text{Ca})$ | $\log_{10}\beta^{\circ}_{213}(\text{Ca})$ | $\log_{10}\beta^{\circ}_{113}(\text{Mg})$ | $\log_{10}K^{\circ}_{113}(\text{Ca})$ | $\log_{10}K^{\circ}_{213}(\text{Ca})$ | $\log_{10}K^{\circ}_{113}(\text{Mg})$ |
|--------|--------------------------------------------------------|-------------------------------------------------|--------------------------------------------------|-------------------------------------------|-------------------------------------------|-------------------------------------------|---------------------------------------|---------------------------------------|---------------------------------------|
| 5      | 22.48                                                  | -6.51                                           | -10.56                                           | -6.06                                     | -19.35                                    | -6.93                                     | 5.60                                  | 9.37                                  | 4.72                                  |
| 10     | 22.28                                                  | -6.46                                           | -10.49                                           | -6.04                                     | -19.29                                    | -6.95                                     | 5.57                                  | 9.27                                  | 4.67                                  |
| 15     | 22.11                                                  | -6.41                                           | -10.43                                           | -6.03                                     | -19.23                                    | -6.96                                     | 5.55                                  | 9.20                                  | 4.63                                  |
| 20     | 21.95                                                  | -6.38                                           | -10.38                                           | -6.02                                     | -19.18                                    | -6.97                                     | 5.55                                  | 9.15                                  | 4.60                                  |
| 22     | 21.93                                                  | -6.37                                           | -10.36                                           | -6.02                                     | -19.16                                    | -6.97                                     | 5.51                                  | 9.10                                  | 4.55                                  |
| 25     | 21.81                                                  | -6.35                                           | -10.34                                           | -6.01                                     | -19.13                                    | -6.98                                     | 5.55                                  | 9.12                                  | 4.58                                  |
| 35     | 21.58                                                  | -6.31                                           | -10.26                                           | -5.99                                     | -19.08                                    | -6.99                                     | 5.56                                  | 9.18                                  | 4.57                                  |
| 40     | 21.48                                                  | -6.29                                           | -10.23                                           | -5.98                                     | -18.98                                    | -7.00                                     | 5.58                                  | 9.11                                  | 4.56                                  |
| 45     | 21.40                                                  | -6.28                                           | -10.20                                           | -5.98                                     | -18.94                                    | -7.01                                     | 5.60                                  | 9.13                                  | 4.55                                  |
| 50     | 21.33                                                  | -6.28                                           | -10.18                                           | -5.97                                     | -18.89                                    | -7.02                                     | 5.62                                  | 9.16                                  | 4.56                                  |
| 55     | 21.27                                                  | -6.28                                           | -10.16                                           | -5.96                                     | -18.85                                    | -7.03                                     | 5.65                                  | 9.20                                  | 4.56                                  |
| 60     | 21.22                                                  | -6.28                                           | -10.15                                           | -5.95                                     | -18.80                                    | -7.04                                     | 5.68                                  | 9.25                                  | 4.57                                  |
| 65     | 21.18                                                  | -6.29                                           | -10.13                                           | -5.94                                     | -18.76                                    | -7.05                                     | 5.71                                  | 9.31                                  | 4.58                                  |
| 70     | 21.15                                                  | -6.29                                           | -10.12                                           | -5.94                                     | -18.72                                    | -7.05                                     | 5.75                                  | 9.38                                  | 4.60                                  |
| 75     | 20.96                                                  | -6.30                                           | -10.12                                           | -5.93                                     | -18.69                                    | -7.06                                     | 5.96                                  | 9.62                                  | 4.62                                  |
| 80     | 20.88                                                  | -6.32                                           | -10.11                                           | -5.92                                     | -18.65                                    | -7.07                                     | 6.06                                  | 9.77                                  | 4.82                                  |
| 85     | 20.81                                                  | -6.33                                           | -10.11                                           | -5.91                                     | -18.61                                    | -7.08                                     | 6.17                                  | 9.92                                  | 4.90                                  |
| 90     | 20.73                                                  | -6.35                                           | -10.11                                           | -5.91                                     | -18.58                                    | -7.09                                     | 6.29                                  | 10.09                                 | 5.00                                  |

$K_{013}$ :  $\text{UO}_2^{2+} + 3\text{CO}_3^{2-} \rightleftharpoons \text{UO}_2(\text{CO}_3)_3^{4-}$  (Eq. 14 in the manuscript)  
 $Q_1$ :  $\text{CO}_2(\text{aq}) + \text{H}_2\text{O} \rightleftharpoons \text{H}^+ + \text{HCO}_3^-$   
 $Q_2$ :  $\text{HCO}_3^- \rightleftharpoons \text{H}^+ + \text{CO}_3^{2-}$  ( $Q_1 + Q_2 = \text{Eq. 14 in the manuscript}$ )  
 $\beta_{113}^{\circ}(\text{Ca})$ :  $\text{Ca}^{2+} + \text{UO}_2^{2+} + 2\text{CO}_2(\text{aq}) + \text{CO}_3^{2-} + 2\text{H}_2\text{O}(\text{l}) \rightleftharpoons \text{CaUO}_2(\text{CO}_3)_3^{2-} + 4\text{H}^+$  (Eq. 15 in the manuscript)  
 $\beta_{213}^{\circ}(\text{Ca})$ :  $2\text{Ca}^{2+} + \text{UO}_2^{2+} + 3\text{CO}_2(\text{aq}) + 3\text{H}_2\text{O}(\text{l}) \rightleftharpoons \text{Ca}_2\text{UO}_2(\text{CO}_3)_3(\text{aq}) + 6\text{H}^+$  (Eq. 16 in the manuscript)  
 $\beta_{113}^{\circ}(\text{Mg})$ :  $\text{Mg}^{2+} + \text{UO}_2^{2+} + 2\text{CO}_2(\text{aq}) + \text{CO}_3^{2-} + 2\text{H}_2\text{O}(\text{l}) \rightleftharpoons \text{MgUO}_2(\text{CO}_3)_3^{2-} + 4\text{H}^+$  (Eq. 15 in the manuscript)  
 $K_{113}^{\circ}(\text{Ca})$ :  $\text{Ca}^{2+} + \text{UO}_2(\text{CO}_3)_3^{4-} \rightleftharpoons \text{CaUO}_2(\text{CO}_3)_3^{2-}$  (Eq. 2 in the manuscript)  
 $K_{213}^{\circ}(\text{Ca})$ :  $2\text{Ca}^{2+} + \text{UO}_2(\text{CO}_3)_3^{4-} \rightleftharpoons \text{Ca}_2\text{UO}_2(\text{CO}_3)_3$  (Eq. 2 in the manuscript)  
 $K_{113}^{\circ}(\text{Mg})$ :  $\text{Mg}^{2+} + \text{UO}_2(\text{CO}_3)_3^{4-} \rightleftharpoons \text{MgUO}_2(\text{CO}_3)_3^{2-}$  (Eq. 2 in the manuscript)

Table S8 Decay-times of  $\text{Mg/Ca}_n\text{UO}_2(\text{CO}_3)_{3^{2n-4}}$  in  $0.10 \text{ mol kg}_w^{-1} \text{ NaCl}$  at variable temperatures:  $5\text{-}30^\circ\text{C}$  for  $\text{Mg}^{2+}$  and  $10\text{-}50^\circ\text{C}$  for  $\text{Ca}^{2+}$ . The values were deduced by averaging the measured decay-times of correspondent sample solutions that gave the slope of 1 or 2 in slope analysis (shown in Fig. 6 for  $\text{Ca}_n\text{UO}_2(\text{CO}_3)_{3^{2n-4}}$  and in Fig. 7 for  $\text{MgUO}_2(\text{CO}_3)_{3^2}$ ). The values at  $22^\circ\text{C}$  were obtained in our previous studies.

| T(°C) | $\text{MgUO}_2(\text{CO}_3)_{3^2}$ (ns) | $\text{CaUO}_2(\text{CO}_3)_{3^2}$ (ns) | $\text{Ca}_2\text{UO}_2(\text{CO}_3)_3$ (ns) |
|-------|-----------------------------------------|-----------------------------------------|----------------------------------------------|
| 5     | $33.80 \pm 2.07$                        | /                                       | /                                            |
| 10    | $25.80 \pm 0.85$                        | $48.52 \pm 2.84$                        | $64.13 \pm 1.89$                             |
| 15    | $22.98 \pm 0.80$                        | $36.70 \pm 2.60$                        | $53.84 \pm 1.47$                             |
| 22    | $23.47 \pm 1.57^4$                      | $28.30 \pm 0.57^5$                      | $46.68 \pm 2.70^5$                           |
| 25    | /                                       | $22.19 \pm 1.01$                        | $31.97 \pm 1.14$                             |
| 30    | $18.49 \pm 0.53$                        | /                                       | /                                            |
| 35    | /                                       | $16.18 \pm 0.70$                        | $22.06 \pm 0.82$                             |
| 40    | /                                       | $16.02 \pm 0.38$                        | $20.07 \pm 0.89$                             |
| 45    | /                                       | $16.60 \pm 0.70$                        | $17.70 \pm 0.71$                             |
| 50    | /                                       | $17.17 \pm 1.16$                        | $16.73 \pm 1.10$                             |

Table S9 Characteristic decomposition parameters of the pure spectral components of  $\text{Ca}_n\text{UO}_2(\text{CO}_3)_3^{(4-2n)-}$  and  $\text{MgUO}_2(\text{CO}_3)_3^{2-}$  shown in Fig. S2 and Fig. S3.

| Peak index                                                          | Peak Type | FWHM     | Center  | Area IntgP |
|---------------------------------------------------------------------|-----------|----------|---------|------------|
| <b>CaUO<sub>2</sub>(CO<sub>3</sub>)<sub>3</sub><sup>2-</sup></b>    |           |          |         |            |
| 1                                                                   | Gaussian  | 23.10    | 479.58  | 14.98      |
| 2                                                                   | Gaussian  | 17.97241 | 496.618 | 28.22      |
| 3                                                                   | Gaussian  | 17.17688 | 514.51  | 24.26      |
| 4                                                                   | Gaussian  | 23.7694  | 533.45  | 16.11      |
| 5                                                                   | Gaussian  | 52.32048 | 552.16  | 16.42      |
| Peak index                                                          | Peak Type | FWHM     | Center  | Area IntgP |
| <b>Ca<sub>2</sub>UO<sub>2</sub>(CO<sub>3</sub>)<sub>3</sub>(aq)</b> |           |          |         |            |
| 1                                                                   | Gaussian  | 13.65    | 465.01  | 14.54      |
| 2                                                                   | Gaussian  | 13.69    | 484.14  | 27.03      |
| 3                                                                   | Gaussian  | 15.97    | 504.62  | 28.42      |
| 4                                                                   | Gaussian  | 17.37    | 525.98  | 17.13      |
| 5                                                                   | Gaussian  | 23.51    | 548.13  | 9.13       |
| 6                                                                   | Gaussian  | 34.64    | 576.52  | 3.76       |
| Peak index                                                          | Peak Type | FWHM     | Center  | Area IntgP |
| <b>MgUO<sub>2</sub>(CO<sub>3</sub>)<sub>3</sub><sup>2-</sup></b>    |           |          |         |            |
| 1                                                                   | Gaussian  | 24.15    | 465.60  | 21.44      |
| 2                                                                   | Gaussian  | 15.45    | 484.98  | 21.17      |
| 3                                                                   | Gaussian  | 17.89    | 502.85  | 22.221     |
| 4                                                                   | Gaussian  | 26.34    | 523     | 16.81      |
| 5                                                                   | Gaussian  | 59.05    | 545.93  | 18.38      |

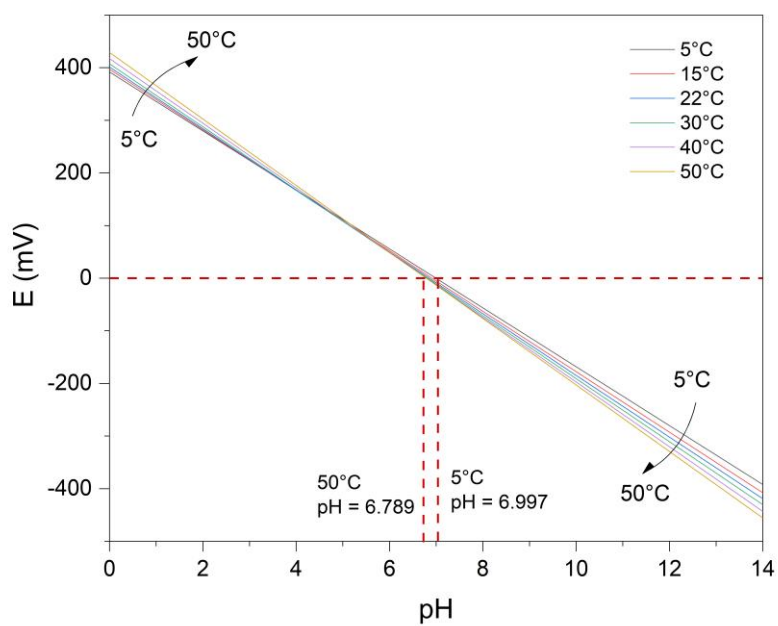

Fig. S1. Calibration lines in the temperature range of 5-50°C and the pH values corresponding to the zero point of electrode at 5°C and 50°C.

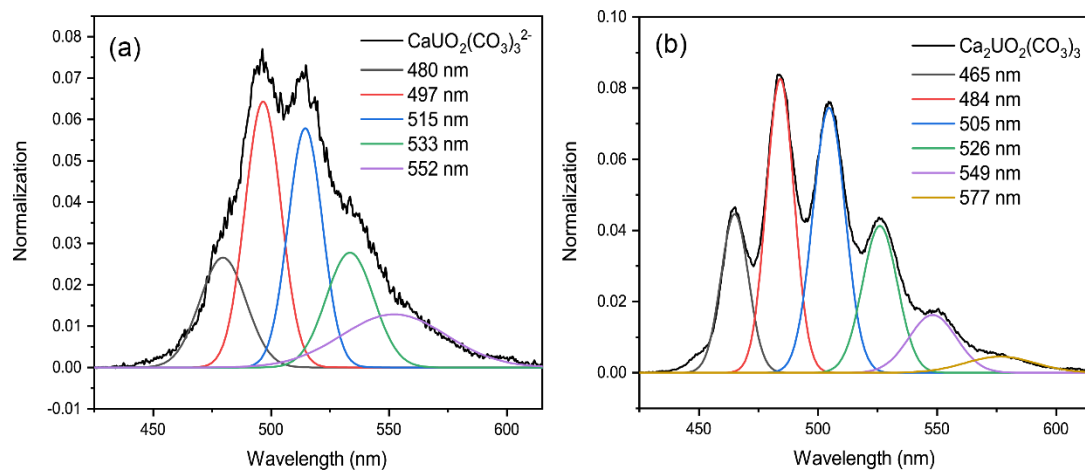

Fig. S2. Gaussian decomposition of the luminescence spectrum of the pure spectral components of (a)  $\text{CaUO}_2(\text{CO}_3)_3^{2-}$  and (b)  $\text{Ca}_2\text{UO}_2(\text{CO}_3)_3(\text{aq})$  normalized to the same area by the MCR-ALS analysis.

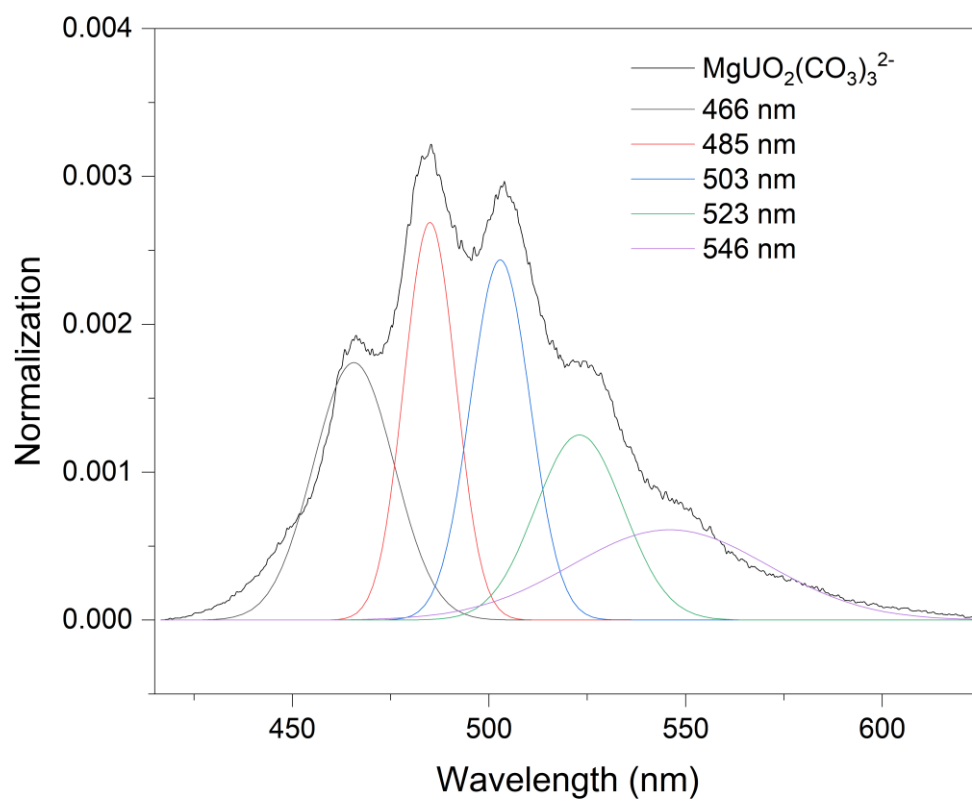

Fig. S3. Gaussian decomposition of the luminescence spectrum of the pure spectral components of  $\text{MgUO}_2(\text{CO}_3)_3^{2-}$  normalized to the same area by the MCR-ALS analysis.

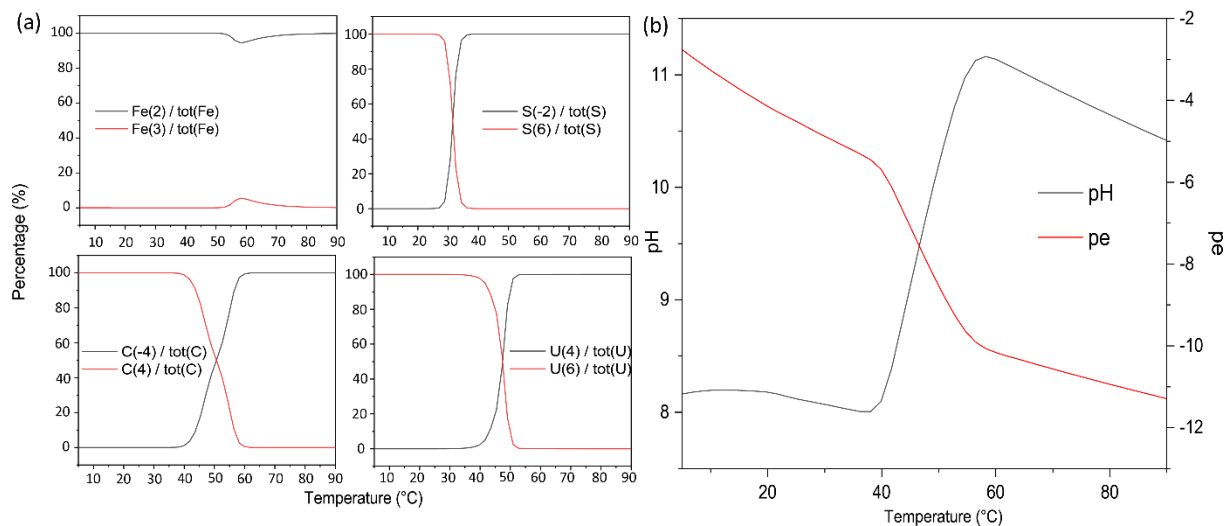

Fig. S4. Change in main oxidation states of Fe, S, C, U (a) and variation of pH and pe (b) as a function of temperature for Boom clay equilibrium waters,  $^{11} P(O_2) = 10^{-68.67}$  atm using thermodynamic data from the Thermochemie 10a database,  $^{12}$  implementing  $SrUO_2(CO_3)_3$ ,  $^{13}$  specific ion interaction coefficients of  $Mg_nCa_nUO_2(CO_3)_3^{(4-2n)-,4-6}$  and their  $\Delta_r H_m^\circ$  values determined in this work based on the isoelectric reaction approximation.

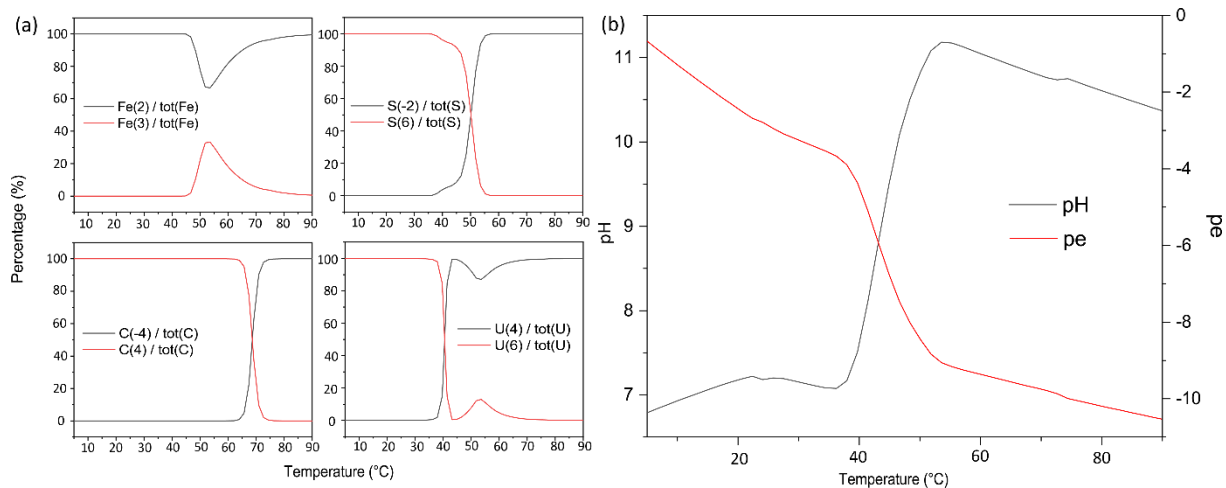

Fig. S5. Change in main oxidation states of Fe, S, C, U (a) and variation of pH and pe (b) as a function of temperature for Callovo-Oxfordian clay equilibrium water,  $P(\text{O}_2) = 10^{-65.83}$  atm using thermodynamic data from the Thermochimie 10a database,<sup>12</sup> implementing  $\text{SrUO}_2(\text{CO}_3)_3^{2-}$ ,<sup>13</sup> specific ion interaction coefficients of  $\text{Mg}_n/\text{Ca}_n\text{UO}_2(\text{CO}_3)_3^{(4-2n)-}$ ,<sup>4-6</sup> and their  $\Delta_r H_m^\circ$  values determined in this work based on the isoelectric reaction approximation.



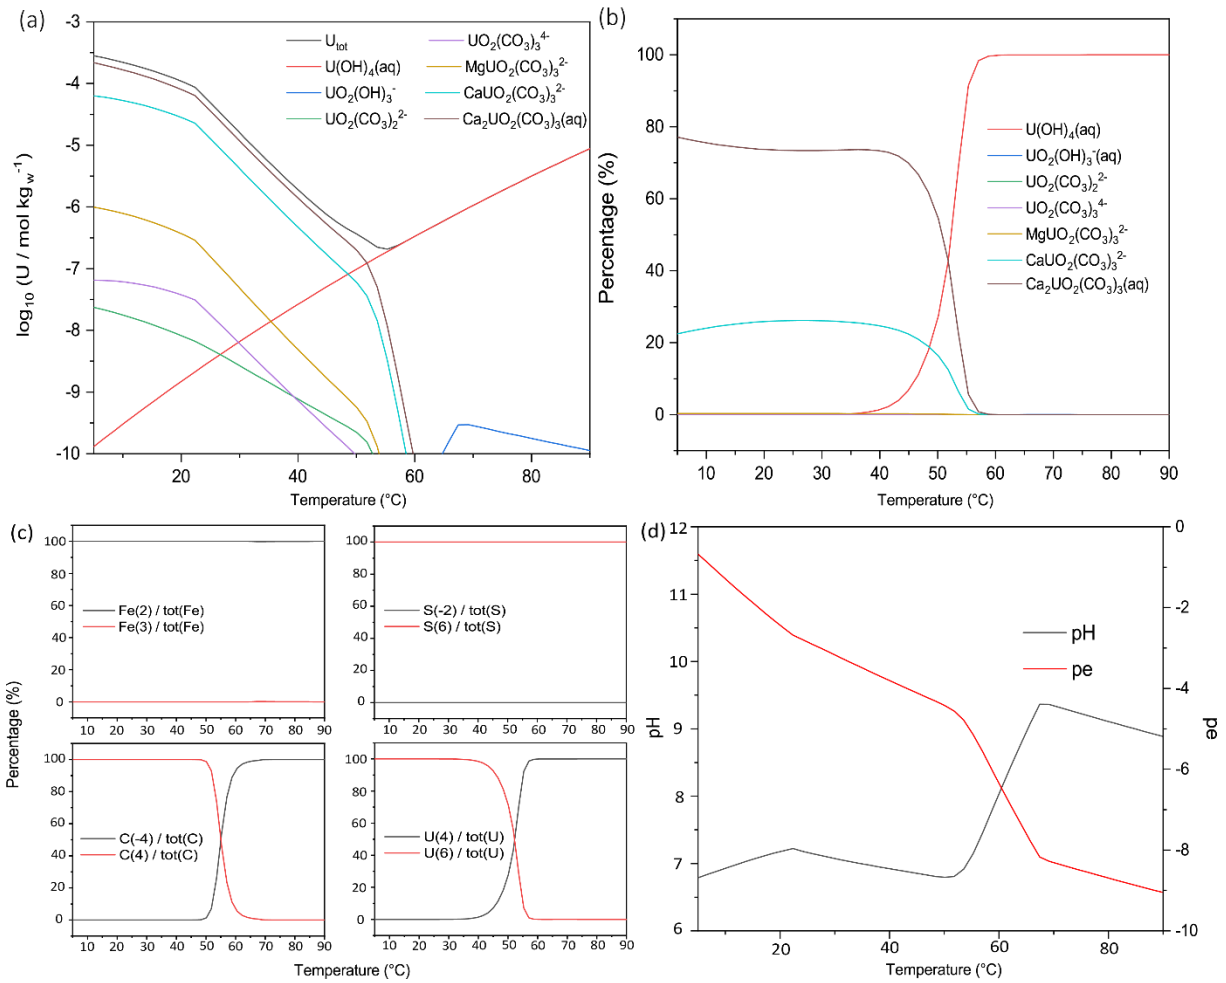

Fig. S6 Solubility of  $\text{UO}_2:2\text{H}_2\text{O}(\text{am})$  (a) and aqueous uranium speciation (b) change in main oxidation states of Fe, S, C, U (c) and variation of pH, pe (d), as a function of temperature for Callovo-Oxfordian clay equilibrium waters,<sup>14</sup>  $P(\text{O}_2) = 10^{-65.83}$  atm using thermodynamic data from the Thermochemie 10a database,<sup>12</sup> implementing  $\text{SrUO}_2(\text{CO}_3)_3^{2-}$ ,<sup>13</sup> specific ion interaction coefficients of  $\text{Mg}_n/\text{Ca}_n\text{UO}_2(\text{CO}_3)_3^{(4-2n)-}$ <sup>4-6</sup> and their  $\Delta_r H_m^\circ$  values determined in this work based on the isoelectric reaction approximation. The reduction reactions of S(+VI) to lower oxidations states were prevented in the input PhreeqC file.

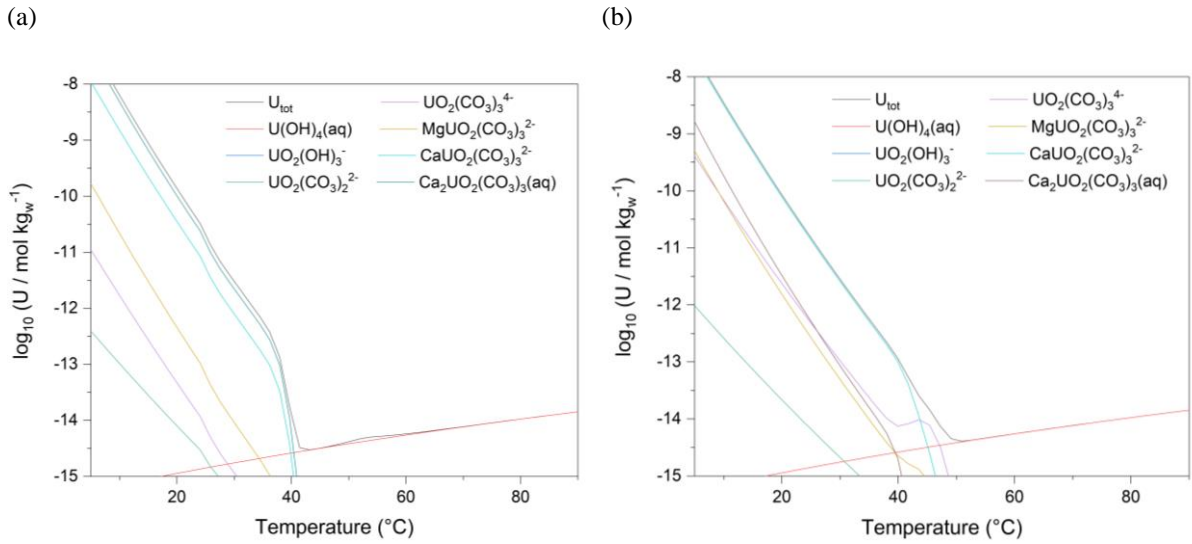

Fig. S7 Solubility of  $\text{UO}_2(\text{cr})$  as a function of temperature (a) for Boom clay equilibrium waters,<sup>11</sup>  $P(\text{O}_2) = 10^{-68.67}$  atm and (b) for Callovo-Oxfordian clay equilibrium waters,<sup>14</sup>  $P(\text{O}_2) = 10^{-65.83}$  atm using thermodynamic data from the Thermochemie 10a database,<sup>12</sup> implementing  $\text{SrUO}_2(\text{CO}_3)_3^{2-}$ ,<sup>13</sup> specific ion interaction coefficients of  $\text{Mg}_n/\text{Ca}_n\text{UO}_2(\text{CO}_3)_3^{(4-2n)-}$ <sup>4-6</sup> and their  $\Delta_r H^\circ_m$  values determined in this work based on the isoelectric reaction approximation.

## References

1. Y. C. Wu, W. F. Koch and R. A. Durst, *Standardization of pH measurements*, Report 260-53, US Department of Commerce, National Bureau of Standards, 1988. <http://nvlpubs.nist.gov/nistpubs/Legacy/SP/nbsspecialpublication260-53e1988.pdf>
2. R. Guillaumont, T. Fanghänel, V. Neck, J. Fuger, D. A. Palmer, I. Grenthe and M. H. Rand, *Update of the Chemical Thermodynamics of Uranium, Neptunium, Plutonium, Americium and Technetium*, OECD Nuclear Energy Agency, Data Bank, Issy-les-Moulineaux, France, 2003.
3. D. D. Wagman, W. Evans, V. B. Parker, R. H. Schumm, I. Halow, S. M. Bailey, K. Churney and R. L. Nuttall, *J. Phys. Chem. Ref. Data*, 1989, **11**, Suppl. 2 1-392.
4. C. Shang and P. Reiller, *Dalton Trans.*, 2021, **50**, 4363-4379.
5. C. Shang and P. E. Reiller, *Dalton Trans.*, 2020, **49**, 466-481.
6. C. Shang, P. E. Reiller and T. Vercouter, *Dalton Trans.*, 2020, **49**, 15443-15460.
7. R. J. Lemire, J. Fuger, H. Nitsche, P. Potter, M. Rand, J. Rydberg, K. Spahiu, J. C. Sullivan, W. J. Ullman, P. Vitorge and H. Wanner, *Chemical Thermodynamics 4. Chemical Thermodynamics of Neptunium and Plutonium*, Chemical Thermodynamics, North Holland Elsevier Science Publishers B. V., Amsterdam, The Netherlands, 2001.
8. C. Götz, G. Geipel and G. Bernhard, in *Uranium, Mining and Hydrogeology*, eds. B. J. Merkel and A. Hasche-Berger, Springer, Berlin, Heidelberg, Germany, 2008, DOI: 10.1007/978-3-540-87746-2\_118, pp. 907-914.
9. C. S. Patterson, G. H. Slocum, R. H. Busey and R. E. Mesmer, *Geochim. Cosmochim. Acta*, 1982, **46**, 1653-1663.
10. C. S. Patterson, R. H. Busey and R. E. Mesmer, *J. Solution Chem.*, 1984, **13**, 647-661.
11. M. de Craen, L. Wang, M. Van Geet and H. Moors, *Geochemistry of Boom Clay pore water at the Mol site*, Report SCK•CEN-BLG-990, SCK•CEN, Mol, Belgium, 2004. [http://jongeren.sckcen.be/~media/Files/Science/disposal\\_radioactive\\_waste/Geochemistry\\_of\\_Boom\\_Clay\\_pore\\_Status\\_2004.pdf](http://jongeren.sckcen.be/~media/Files/Science/disposal_radioactive_waste/Geochemistry_of_Boom_Clay_pore_Status_2004.pdf)
12. Thermochemie Database, <http://www.thermochemie-tdb.com/>.
13. W. Dong and S. C. Brooks, *Environ. Sci. Technol.*, 2006, **40**, 4689-4695.
14. E. C. Gaucher, C. Tournassat, F. J. Pearson, P. Blanc, C. Crouzet, C. Lerouge and S. Altmann, *Geochim. Cosmochim. Acta*, 2009, **73**, 6470-6487.
